# Supplementary material for: Synthesis of Cyano-Benzylidene Xanthene Synthons Using a Diprotic Brønsted Acid Catalyst, and Their Application as Efficient Inhibitors of Aluminum Corrosion in Alkaline Solutions
Source: MDPI journal article supplement (doi:10.3390/molecules27175733), 2022-09-05
Supplement: s1 [file s1]

# Synthesis of Cyano-Benzylidene Xanthene Synthons Using a Diprotic Brønsted Acid Catalyst, and Their Application as Efficient Inhibitors of Aluminum Corrosion in Alkaline Solutions

Mohammed A. Amin <sup>1,\*</sup>, Gaber A. M. Mersal <sup>1</sup>, Morad M. El-Hendawy <sup>2</sup>, Abdallah A. Shaltout <sup>3</sup>, Ali Badawi <sup>3</sup>, Johan Boman <sup>4</sup>, Adil A. Gobouri <sup>1</sup>, Murat Saracoglu <sup>5</sup>, Fatma Kandemirli <sup>6</sup>, Rabah Boukherroub <sup>7</sup>, Jacek Ryl <sup>8,\*</sup> and Mohamed E. Khalifa <sup>1</sup>

<sup>1</sup> Department of Chemistry, College of Science, Taif University, P.O. Box 11099, Taif 21944, Saudi Arabia

<sup>2</sup> Chemistry Department, Faculty of Science, New Valley University, Kharga 72511, Egypt

<sup>3</sup> Department of Physics, College of Science, Taif University, P.O. Box 11099, Taif 21944, Saudi Arabia

<sup>4</sup> Department of Chemistry and Molecular Biology, Atmospheric Science, University of Gothenburg, 412 96 Gothenburg, Sweden

<sup>5</sup> Faculty of Education, Erciyes University, 38039 Kayseri, Turkey

<sup>6</sup> Department of Biomedical Engineering, Faculty of Engineering and Architecture, Kastamonu University, 37150 Kastamonu, Turkey

<sup>7</sup> University of Lille, CNRS, Centrale Lille, University Polytechnique Hauts-de-France, UMR 8520-IEMN, F-59000 Lille, France

<sup>8</sup> Division of Electrochemistry and Surface Physical Chemistry, Institute of Nanotechnology and Materials Engineering, Gdansk University of Technology, Narutowicza 11/12, 80-233 Gdansk, Poland

\* Correspondence: mohamed@tu.edu.sa (M.A.A.); jacek.ryl@pg.edu.pl (J.R.)

## S1. General procedure of the synthesis of the studied compounds

### S1.1. Synthesis of 3-(3,3,6,6-tetramethyl-1,8-dioxo-2,3,4,5,6,7,8,9-octahydro-1H-xanthen-9-yl)benzaldehyde (3)

The synthesis of compound **3** was performed by the reaction of 5,5-dimethylcyclohexan-1,3-dione (**1**; 20 mmol, 2.80 g) with isophthalaldehyde (**2**; 10 mmol, 1.34 g) and oxalic acid solution as a catalyst (10 mmol, 0.99 g) at 80 °C in a water bath under constant stirring for 40 min. The reaction mixture was then poured onto ice-cold water. The solid product was collected, filtered off, dried and recrystallized from ethanol as buff crystals in 67% yield; M.p. 156-158 °C; <sup>1</sup>H-NMR (DMSO-*d*<sub>6</sub>) (δ/ppm): 2.36 (s, 12H, 3Me), 2.49 (s, 4H, Xanthene<sub>(C4,5)</sub>-H), 3.35 (s, 4H, Xanthene<sub>(C2,7)</sub>-H), 7.72-7.91(m, 4H, Ar-H), 9.88 (s, 1H, CHO). <sup>13</sup>C-NMR (300 MHz): 27.5 (4 Me), 32.2 (C-3,6-xanth), 38.7, 51.6 (4CH<sub>2</sub>), 39.1 (C-9-xanth), 113.8, 126.8, 129.1, 130.1, 133.4, 139.3, 142.5, 155.1 (5C=C), 191.1 (CHO), 198.8 (2C=O); MS (*m/z*, %): 379.19 (M+1, 26.4). Anal. Calcd. for C<sub>24</sub>H<sub>26</sub>O<sub>4</sub> (378.46) C, 76.17; H, 6.92; O, 16.91%. Found: C, 76.01; H, 6.75; O, 16.81%.

### S1.2. General procedure for the synthesis of 2-(4-(12H-dibenzo[*c*]xanthen-7-yl)benzylidene) derivatives (compounds 4-6).

The xanthene derivative (**3**; 10 mmol, 3.86 g) was allowed to react with a molar ratio of the active nitrile compounds, malononitrile (0.66 g), cyanoacetic acid (0.85 g) or ethylcyanoacetate (1.13 g). The reaction mixture was kept under magnetic stirring at ambient temperature for 2 h in 30 mL ethanol and piperidine (2 mL) as basic catalyst. The mixture was poured onto ice-cold water and then acidified with dilute hydrochloric acid (2 M). The product was filtered off, dried and recrystallized from ethanol, yielding the cyanobenzylidene xanthenes (compounds **4-6**), respectively.

#### 2-(3-(3,3,6,6-Tetramethyl-1,8-dioxo-2,3,4,5,6,7,8,9-octahydro-1H-xanthen-9-yl)benzylidene)malononitrile (**4**).

Faint yellow crystals; Yield: 73% (3.10 g); M.p. >250 °C. IR: ν<sub>max</sub>=2871(=CH Ar), 2190, (C≡N<sub>str.</sub>), 1666 (C=O<sub>str.</sub> aldehydic), 1476 (CH<sub>2</sub>), 1365 (CH<sub>3</sub>) and 1213 (C-O xanthene ring) cm<sup>-1</sup>. <sup>1</sup>H-NMR (300 MHz, DMSO-*d*<sub>6</sub>) (δ/ppm): 2.38 (s, 12H, 4 Me); 2.51 (s, 4H, Xanthene<sub>(C4,5)</sub>-H), 3.37 (s, 4H, Xanthene<sub>(C2,7)</sub>-H); 7.35-7.84 (m, 4H, Ar-H); 7.93 (s, 1H, olefinic proton). <sup>13</sup>C-NMR (75 MHz) δ: 199.12, 159.11, 147.12, 136.13, 128.10, 124.95, 108.31. MS (*m/z*, %): 427.20 (M+1, 29.6). Anal. calc. for C<sub>27</sub>H<sub>25</sub>N<sub>2</sub>O<sub>3</sub> (426.51) C, 76.03; H, 6.14; N, 6.57 (Found: C, 76.45; H, 6.56; N, 6.87).

***2-Cyano-3-(3-(3,3,6,6-tetramethyl-1,8-dioxo-2,3,4,5,6,7,8,9-octahydro-1H-xanthen-9-yl)phenyl)acrylic acid***

**(5).** Faint yellow crystals; Yield: 68% (3.02 g); M.p. 120-121 °C. IR:  $\nu_{\max}$ =3392 ( $\text{OH}_{\text{str.}}$ ), 2226, ( $\text{C}\equiv\text{N}_{\text{str.}}$ ), 1666 ( $\text{C}=\text{O}_{\text{str.}}$  carboxylic), 1470 ( $\text{CH}_2$ ), 1365 ( $\text{CH}_3$ ) and 1213 (C-O xanthene ring)  $\text{cm}^{-1}$ .  $^1\text{H}$ -NMR (300 MHz,  $\text{DMSO-}d_6$ ) ( $\delta/\text{ppm}$ ): 2.38 (s, 12H, 4  $\text{CH}_3$ ); 2.51 (s, 4H, Xanthene( $\text{C}_{4,5}$ )-H), 3.35 (s, 4H, Xanthene( $\text{C}_{2,7}$ )-H); 7.74-7.95 (m, 4H, Ar-H); 8.53 (s, 1H, olefinic proton); 12.45 (s, 1H, COOH).  $^{13}\text{C}$ -NMR (75 MHz)  $\delta$ : 199.12, 159.11, 147.12, 136.13, 128.10, 124.95, 108.31. MS ( $m/z$ , %): 445.19 ( $\text{M}^+$ , 4.31). Anal. calc. for  $\text{C}_{27}\text{H}_{27}\text{NO}_5$  (445.51) C, 72.79; H, 6.11; N, 3.14 (Found: C, 72.65; H, 6.33; N, 3.46).

***Ethyl-2-cyano-3-(3-(3,3,6,6-tetramethyl-1,8-dioxo-2,3,4,5,6,7,8,9-octahydro-1H-xanthen-9-yl)phenyl)acrylate***

**(6).** Yellow crystals; Yield: 81% (4.73 g); M.p. 134-136 °C; IR:  $\nu_{\max}$ =2957 ( $=\text{CH}$  Ar), 2232, ( $\text{C}\equiv\text{N}_{\text{str.}}$ ), 1666 ( $\text{C}=\text{O}_{\text{str.}}$  aldehydic), 1447 ( $\text{CH}_2$ ), 1365 ( $\text{CH}_3$ ) and 1213 (C-O xanthene ring)  $\text{cm}^{-1}$ .  $^1\text{H}$ -NMR (300 MHz,  $\text{DMSO-}d_6$ ) ( $\delta/\text{ppm}$ ): 1.28 (s, 12H, 4  $\text{CH}_3$ ); 1.31 (t, 3H,  $\text{CH}_3$ ); 2.51 (s, 4H, Xanthene( $\text{C}_{4,5}$ )-H), 3.44 (s, 4H, Xanthene( $\text{C}_{2,7}$ )-H); 4.25 (q, 2H,  $\text{CH}_2$ ); 7.36-7.95 (m, 4H, Ar-H); 8.51 (s, 1H, olefinic proton).  $^{13}\text{C}$ -NMR (75 MHz)  $\delta$ : 199.12, 159.11, 147.12, 136.13, 128.10, 124.95, 108.31. MS ( $m/z$ , %): 474.22 ( $\text{M}+1$ , 31.9). Anal. calc. for  $\text{C}_{29}\text{H}_{31}\text{NO}_5$  (473.56) C, 73.55; H, 6.60; N, 2.96 (Found: C, 73.45; H, 6.54; N, 3.26).

## S2. $^1\text{H}$ -NMR and FTIR spectra of the studied xanthene derivatives

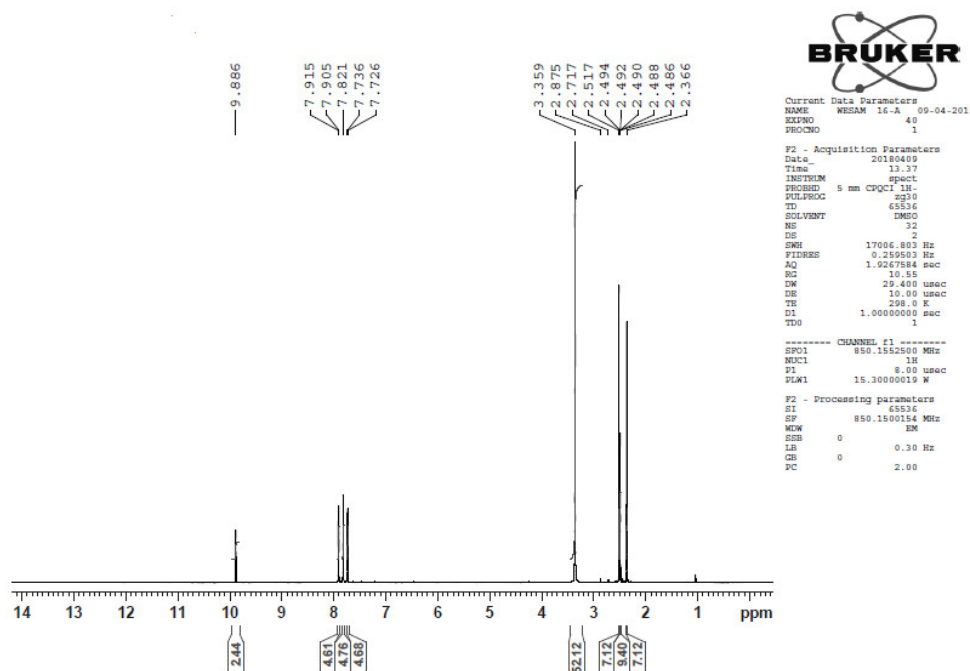

Figure S1.  $^1\text{H}$ -NMR spectrum of benzaldehyde xanthene derivative (**3**).

The xanthene-benzaldehyde (**3**) is hence incorporated in a set of reactions with different active nitriles, malononitrile, cyanoacetic acid or ethylcyanoacetate in presence of basic catalyst (piperidine), to synthesize derivatives (**4-6**), as shown in Scheme 2.

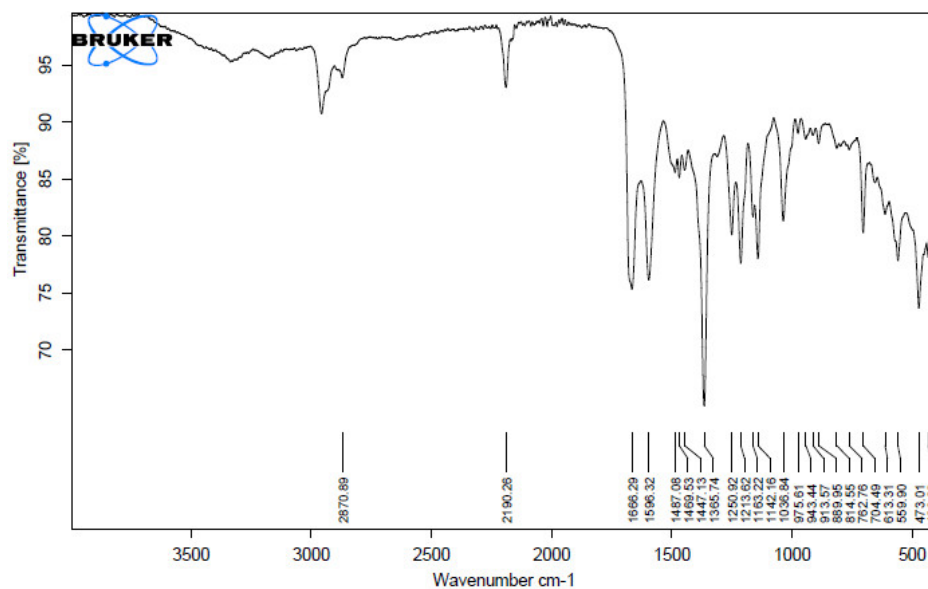

Figure S2. FTIR spectrum of malononitrile xanthene derivative (**4**).

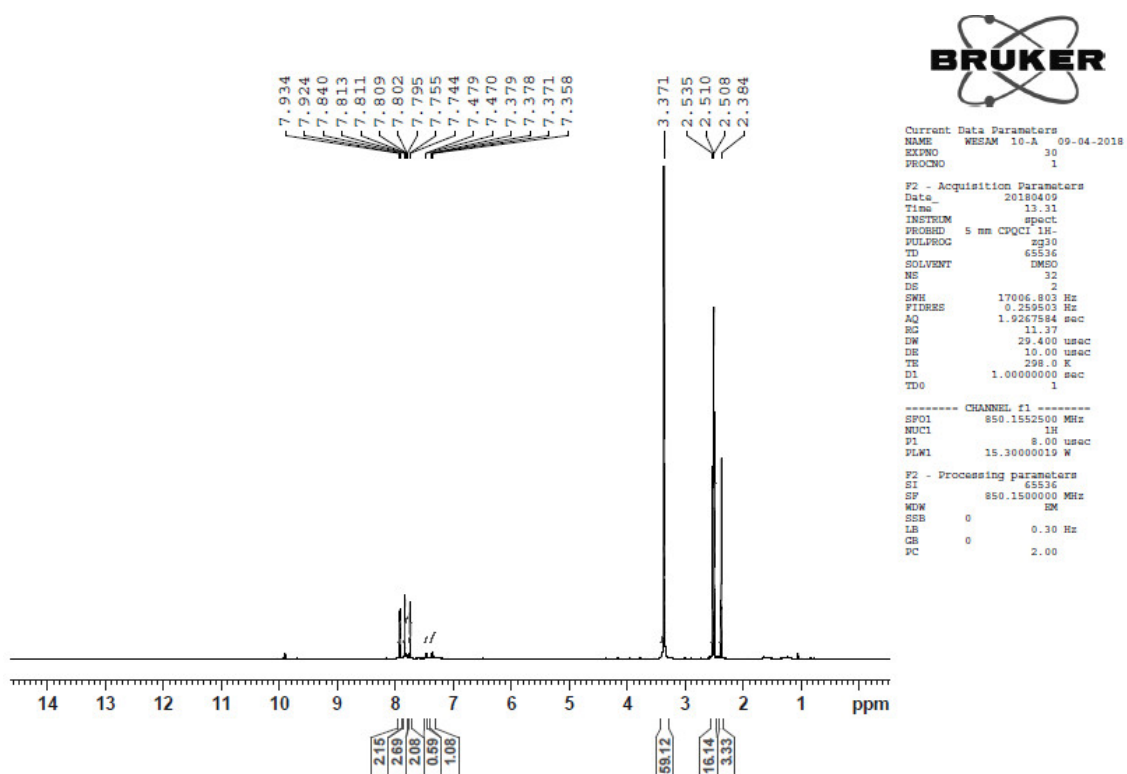

Figure S3. <sup>1</sup>H-NMR spectrum of malononitrile xanthene derivative (4).

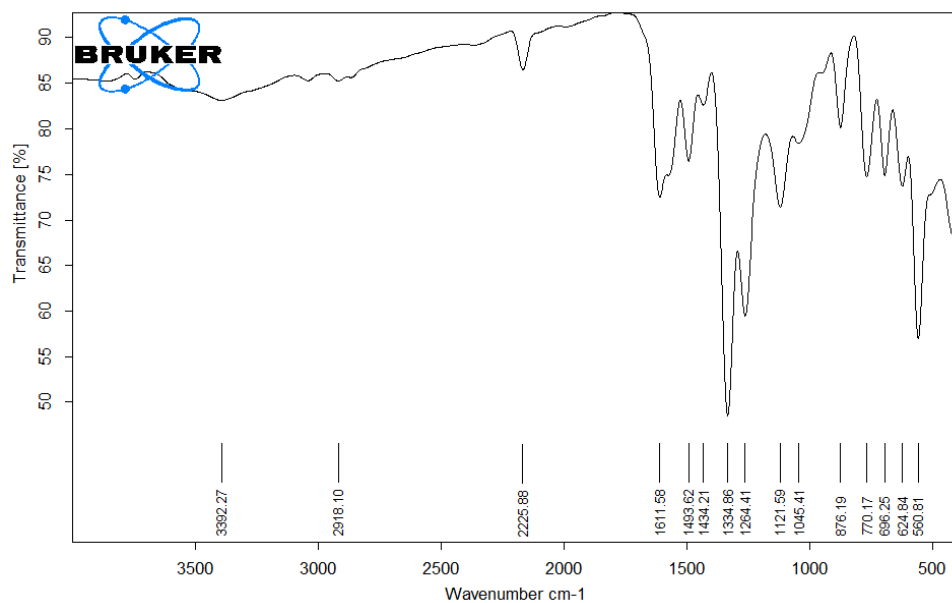

Figure S4. FTIR spectrum of acrylic acid xanthene derivative (5).

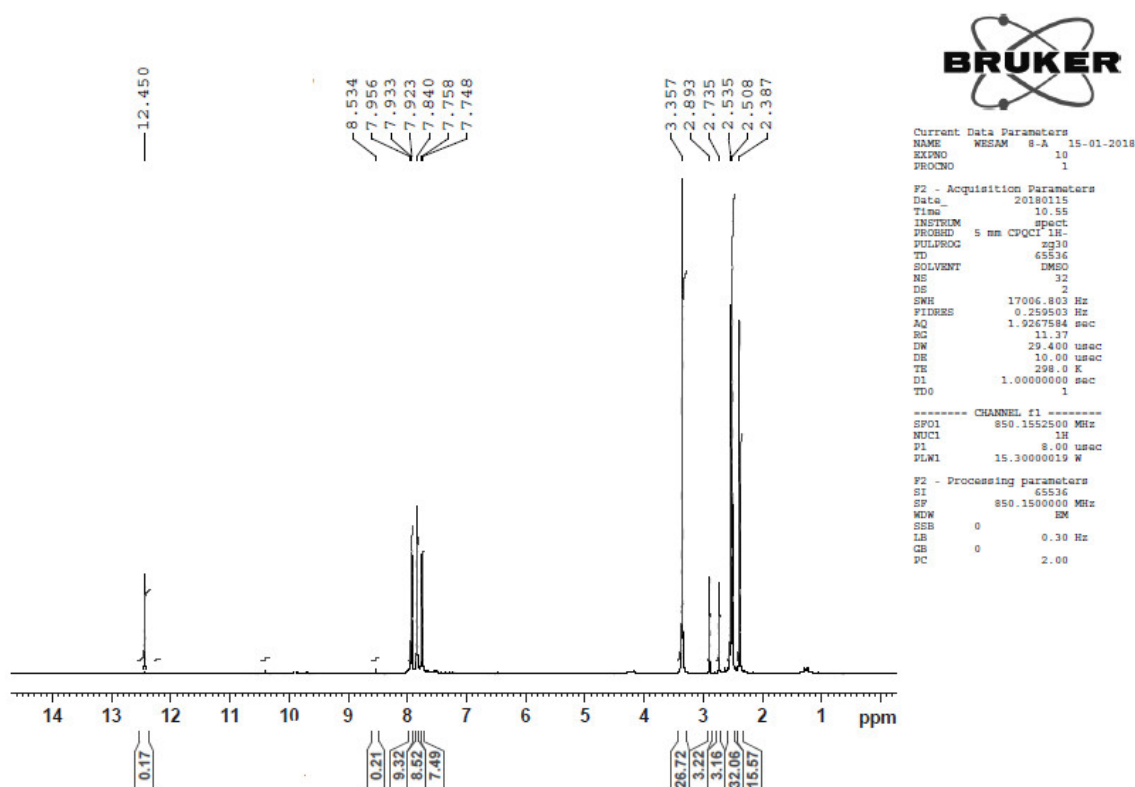

Figure S5.  $^1\text{H}$ -NMR plot of acrylic acid xanthene derivative (5).

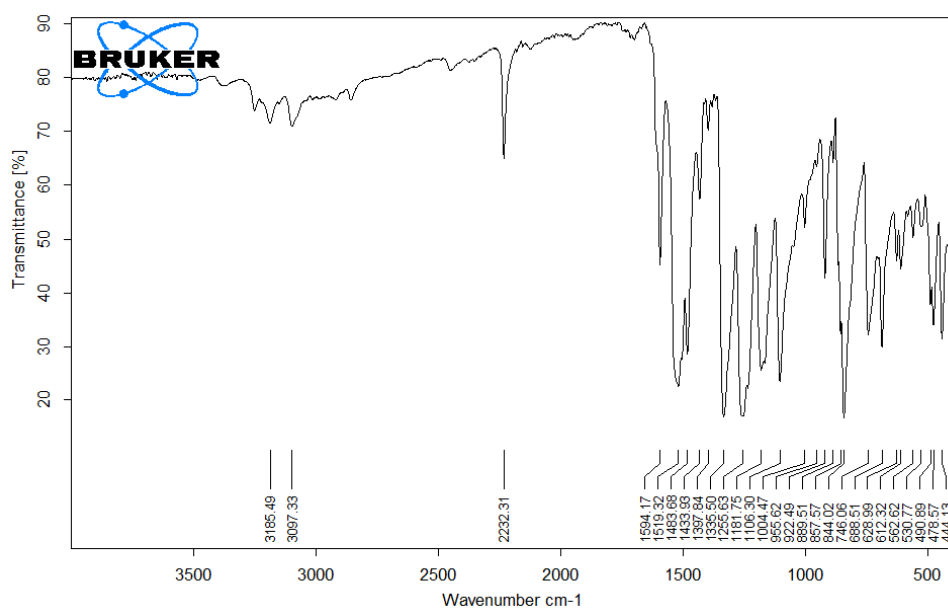

Figure S6. FTIR spectrum of acrylate xanthene derivative (6).

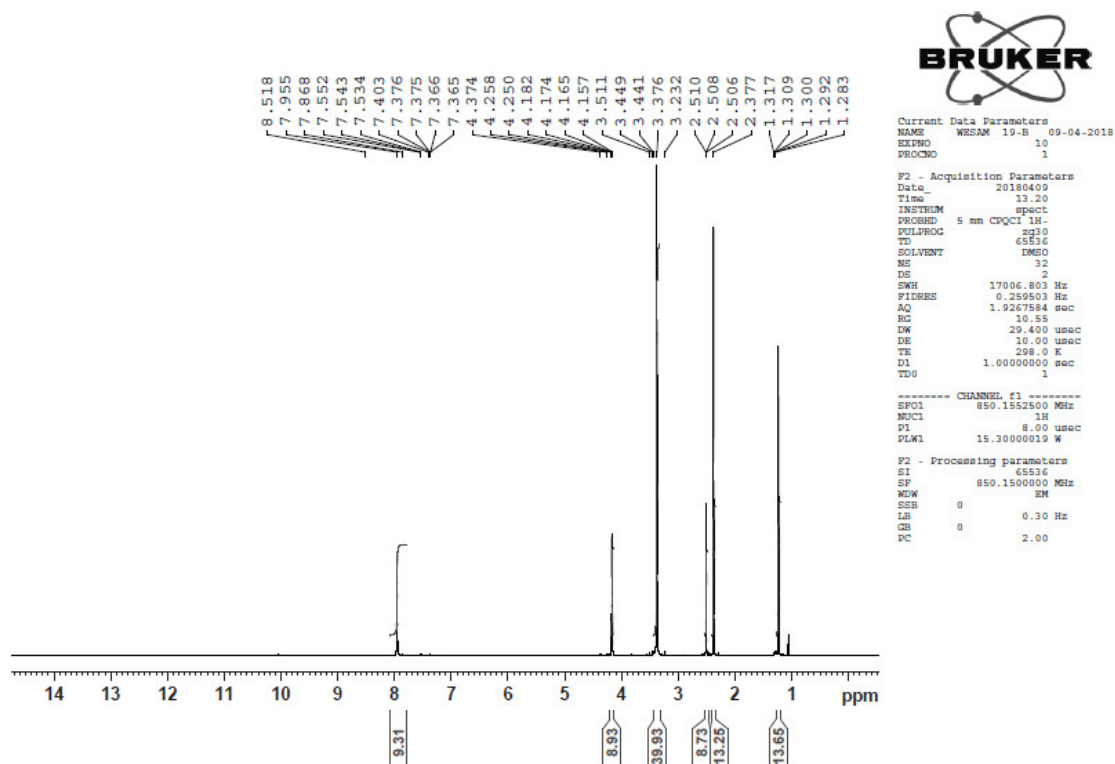

**Figure S7.** <sup>1</sup>H-NMR spectrum of acrylate xanthene derivative (**6**).

### S3. Electrochemical kinetic parameters based on polarization studies

**Table S1** – Various electrochemical kinetic parameters recorded for compound **3**, derived from polarization measurements employing the Tafel extrapolation and LPR methods.

| [Inhibitor] /<br>mM | Tafel extrapolation method                         |                                           |                                              |                                              |                              |         | LPR method                                |                                           |                              |         |
|---------------------|----------------------------------------------------|-------------------------------------------|----------------------------------------------|----------------------------------------------|------------------------------|---------|-------------------------------------------|-------------------------------------------|------------------------------|---------|
|                     | $E_{\text{corr}} / \text{V}$<br><i>vs.</i> Ag/AgCl | $j_{\text{corr}} /$<br>$\text{A cm}^{-2}$ | $\beta_{\text{c}} /$<br>$\text{mV dec}^{-1}$ | $\beta_{\text{a}} /$<br>$\text{mV dec}^{-1}$ | $v /$<br>$\text{mm yr}^{-1}$ | $I(\%)$ | $j_{\text{corr}} /$<br>$\text{A cm}^{-2}$ | $R_{\text{p}} /$<br>$\Omega \text{ cm}^2$ | $v /$<br>$\text{mm yr}^{-1}$ | $I(\%)$ |
| <b>0.0</b>          | -1.520                                             | $1.26 \times 10^{-3}$                     | -0.249                                       | 0.241                                        | 13.73                        | ----    | $1.17 \times 10^{-3}$                     | 45.45                                     | 12.75                        | ----    |
| <b>0.1</b>          | -1.482                                             | $7.7 \times 10^{-4}$                      | -0.245                                       | 0.290                                        | 8.39                         | 38.9    | $7.04 \times 10^{-4}$                     | 81.91                                     | 7.67                         | 39.8    |
| <b>0.2</b>          | -1.469                                             | $6.4 \times 10^{-4}$                      | -0.259                                       | 0.219                                        | 6.98                         | 49.2    | $5.66 \times 10^{-4}$                     | 91.03                                     | 6.17                         | 51.6    |
| <b>0.5</b>          | -1.452                                             | $2.78 \times 10^{-4}$                     | -0.256                                       | 0.260                                        | 3.03                         | 77.9    | $2.38 \times 10^{-4}$                     | 235.34                                    | 2.59                         | 79.7    |
| <b>1.0</b>          | -1.427                                             | $1.46 \times 10^{-4}$                     | -0.273                                       | 0.250                                        | 1.59                         | 88.4    | $1.19 \times 10^{-4}$                     | 476.17                                    | 1.30                         | 89.8    |
| <b>2.0</b>          | -1.399                                             | $1.03 \times 10^{-4}$                     | -0.261                                       | 0.196                                        | 1.12                         | 91.8    | $8.78 \times 10^{-5}$                     | 553.6                                     | 0.96                         | 92.5    |

**Table S2** – Various electrochemical kinetic parameters recorded for compound **5**, derived from polarization measurements employing the Tafel extrapolation and LPR methods.

| [Inhibitor] /<br>mM | Tafel extrapolation method                         |                                           |                                              |                                              |                              |         | LPR method                                |                                           |                              |         |
|---------------------|----------------------------------------------------|-------------------------------------------|----------------------------------------------|----------------------------------------------|------------------------------|---------|-------------------------------------------|-------------------------------------------|------------------------------|---------|
|                     | $E_{\text{corr}} / \text{V}$<br><i>vs.</i> Ag/AgCl | $j_{\text{corr}} /$<br>$\text{A cm}^{-2}$ | $\beta_{\text{c}} /$<br>$\text{mV dec}^{-1}$ | $\beta_{\text{a}} /$<br>$\text{mV dec}^{-1}$ | $v /$<br>$\text{mm yr}^{-1}$ | $I(\%)$ | $j_{\text{corr}} /$<br>$\text{A cm}^{-2}$ | $R_{\text{p}} /$<br>$\Omega \text{ cm}^2$ | $v /$<br>$\text{mm yr}^{-1}$ | $I(\%)$ |
| <b>0.0</b>          | -1.520                                             | $1.26 \times 10^{-3}$                     | -0.249                                       | 0.241                                        | 13.72                        | ----    | $1.17 \times 10^{-3}$                     | 45.45                                     | 12.74                        | ----    |
| <b>0.1</b>          | -1.489                                             | $6.72 \times 10^{-4}$                     | -0.243                                       | 0.288                                        | 7.32                         | 46.7    | $6.44 \times 10^{-4}$                     | 88.86                                     | 7.015                        | 44.9    |
| <b>0.2</b>          | -1.464                                             | $6.12 \times 10^{-4}$                     | -0.257                                       | 0.221                                        | 6.67                         | 51.4    | $5.53 \times 10^{-4}$                     | 93.3                                      | 6.02                         | 52.7    |
| <b>0.5</b>          | -1.446                                             | $2.2 \times 10^{-4}$                      | -0.255                                       | 0.262                                        | 2.39                         | 82.6    | $2.23 \times 10^{-4}$                     | 251.6                                     | 2.43                         | 81.0    |
| <b>1.0</b>          | -1.422                                             | $9.07 \times 10^{-5}$                     | -0.270                                       | 0.255                                        | 0.99                         | 92.8    | $9.83 \times 10^{-5}$                     | 579.3                                     | 1.07                         | 91.6    |
| <b>2.0</b>          | -1.383                                             | $6.43 \times 10^{-5}$                     | -0.263                                       | 0.199                                        | 0.70                         | 94.9    | $7.72 \times 10^{-5}$                     | 637.2                                     | 0.84                         | 93.4    |

**Table S3** – Various electrochemical kinetic parameters recorded for compound **6**, derived from polarization measurements employing the Tafel extrapolation and LPR methods.

| [Inhibitor] /<br>mM | Tafel extrapolation method                         |                                           |                                              |                                              |                              |         | LPR method                                |                                           |                              |         |
|---------------------|----------------------------------------------------|-------------------------------------------|----------------------------------------------|----------------------------------------------|------------------------------|---------|-------------------------------------------|-------------------------------------------|------------------------------|---------|
|                     | $E_{\text{corr}} / \text{V}$<br><i>vs.</i> Ag/AgCl | $j_{\text{corr}} /$<br>$\text{A cm}^{-2}$ | $\beta_{\text{c}} /$<br>$\text{mV dec}^{-1}$ | $\beta_{\text{a}} /$<br>$\text{mV dec}^{-1}$ | $v /$<br>$\text{mm yr}^{-1}$ | $I(\%)$ | $j_{\text{corr}} /$<br>$\text{A cm}^{-2}$ | $R_{\text{p}} /$<br>$\Omega \text{ cm}^2$ | $v /$<br>$\text{mm yr}^{-1}$ | $I(\%)$ |



|            |        |                       |        |       |       |      |                       |        |       |       |
|------------|--------|-----------------------|--------|-------|-------|------|-----------------------|--------|-------|-------|
| <b>0.0</b> | -1.520 | $1.26 \times 10^{-3}$ | -0.249 | 0.241 | 13.72 | ---- | $1.17 \times 10^{-3}$ | 45.45  | 12.74 | ----- |
| <b>0.1</b> | -1.499 | $6.44 \times 10^{-4}$ | -0.245 | 0.290 | 7.02  | 48.9 | $5.9 \times 10^{-4}$  | 97.74  | 6.43  | 49.6  |
| <b>0.2</b> | -1.482 | $5.57 \times 10^{-4}$ | -0.255 | 0.218 | 6.07  | 55.8 | $5.00 \times 10^{-4}$ | 102.06 | 5.45  | 57.2  |
| <b>0.5</b> | -1.463 | $1.86 \times 10^{-4}$ | -0.256 | 0.260 | 2.03  | 85.2 | $1.97 \times 10^{-4}$ | 284.3  | 2.15  | 83.2  |
| <b>1.0</b> | -1.449 | $7.18 \times 10^{-5}$ | -0.273 | 0.257 | 0.78  | 94.3 | $7.61 \times 10^{-5}$ | 755.3  | 0.83  | 93.5  |
| <b>2.0</b> | -1.435 | $4.03 \times 10^{-5}$ | -0.265 | 0.202 | 0.44  | 96.8 | $4.80 \times 10^{-5}$ | 1036.9 | 0.52  | 95.9  |

**Table S4** – Various electrochemical kinetic parameters recorded for compound **4 (the best one)**, derived from polarization measurements employing the Tafel extrapolation and LPR methods.

| [Inhibitor] /<br>mM | Tafel extrapolation method                         |                                           |                                              |                                              |                              |         | LPR method                                |                                           |                              |         |
|---------------------|----------------------------------------------------|-------------------------------------------|----------------------------------------------|----------------------------------------------|------------------------------|---------|-------------------------------------------|-------------------------------------------|------------------------------|---------|
|                     | $E_{\text{corr}} / \text{V}$<br><i>vs. Ag/AgCl</i> | $j_{\text{corr}} /$<br>$\text{A cm}^{-2}$ | $\beta_{\text{c}} /$<br>$\text{mV dec}^{-1}$ | $\beta_{\text{a}} /$<br>$\text{mV dec}^{-1}$ | $v /$<br>$\text{mm yr}^{-1}$ | $I(\%)$ | $j_{\text{corr}} /$<br>$\text{A cm}^{-2}$ | $R_{\text{p}} /$<br>$\Omega \text{ cm}^2$ | $v /$<br>$\text{mm yr}^{-1}$ | $I(\%)$ |
| <b>0.0</b>          | -1.520                                             | $1.26 \times 10^{-3}$                     | -0.249                                       | 0.241                                        | 13.72                        | ----    | $1.17 \times 10^{-3}$                     | 45.45                                     | 12.74                        | -----   |
| <b>0.1</b>          | -1.531                                             | $5.97 \times 10^{-4}$                     | -0.247                                       | 0.289                                        | 6.50                         | 52.6    | $5.62 \times 10^{-4}$                     | 102.90                                    | 6.12                         | 52.0    |
| <b>0.2</b>          | -1.581                                             | $5.20 \times 10^{-4}$                     | -0.258                                       | 0.220                                        | 5.66                         | 58.7    | $4.75 \times 10^{-4}$                     | 108.55                                    | 5.17                         | 59.4    |
| <b>0.5</b>          | -1.590                                             | $1.32 \times 10^{-4}$                     | -0.255                                       | 0.258                                        | 1.44                         | 89.5    | $1.16 \times 10^{-4}$                     | 480.05                                    | 1.26                         | 90.1    |
| <b>1.0</b>          | -1.586                                             | $3.02 \times 10^{-5}$                     | -0.275                                       | 0.256                                        | 0.33                         | 97.6    | $3.74 \times 10^{-5}$                     | 1539.26                                   | 0.41                         | 96.8    |
| <b>2.0</b>          | -1.567                                             | $1.39 \times 10^{-5}$                     | -0.268                                       | 0.199                                        | 0.15                         | 98.9    | $1.87 \times 10^{-5}$                     | 2651.77                                   | 0.20                         | 98.4    |

#### **S4. Cartesian coordinates for the optimized geometry of the studied xanthene:**

(3)

C 0.62052000 -3.76771300 -0.21785500  
C 2.14134700 -3.58836400 -0.00710400  
C 2.39235900 -2.34100100 0.89289400  
C 1.55127100 -1.19113900 0.46303700  
C 0.41405300 -1.23807900 -0.25667300  
C -0.06722700 -2.53859700 -0.78507900  
O 2.11984900 0.00090800 0.91975900  
C 1.55024500 1.19246600 0.46303700  
C 0.41298800 1.23842700 -0.25667400  
C -0.39599700 -0.00017500 -0.55908700  
C 2.39034200 2.34305200 0.89289500  
C 2.13825400 3.59020100 -0.00709800  
C 0.61727200 3.76823700 -0.21785100  
C -0.06941000 2.53853000 -0.78508200  
C 2.70858300 -4.82910700 0.69974500  
C 2.83943700 -3.39720100 -1.36135200  
C 2.70441700 4.83143000 0.69975500  
C 2.83651000 3.39964400 -1.36134600  
C -1.67262600 -0.00072200 0.26799900  
C -2.91908100 -0.00124500 -0.37599800  
C -4.09813500 -0.00175000 0.38020100  
C -4.03758800 -0.00173300 1.78293700  
C -2.79766000 -0.00121300 2.42242000  
C -1.61872200 -0.00070800 1.66786000  
C -5.42177800 -0.00230600 -0.30457400  
O -5.54622600 -0.00235600 -1.51025800  
O -0.95010400 -2.63356900 -1.60687800  
O -0.95236000 2.63274100 -1.60688900  
H 0.12318800 -4.03170600 0.73745500  
H 0.42726300 -4.63132300 -0.88753900  
H 2.16459600 -2.58106800 1.95445700  
H 3.46863600 -2.06911800 0.88468700  
H -0.66248000 -0.00029000 -1.65515900  
H 2.16237300 2.58291900 1.95446000  
H 3.46685300 2.07209600 0.88468600  
H 0.42327000 4.63168300 -0.88753000  
H 0.11971100 4.03179500 0.73746100  
H 2.22211300 -5.01721200 1.66248300  
H 2.57263300 -5.73049400 0.08964300  
H 3.78353200 -4.73141700 0.88745300  
H 3.92483600 -3.30494500 -1.25304600  
H 2.65287100 -4.24434500 -2.03218500  
H 2.48493500 -2.49858800 -1.88108300  
H 2.21778300 5.01911200 1.66249400  
H 3.77945000 4.73466800 0.88746500  
H 2.56769000 5.73270200 0.08965600  
H 3.92198800 3.30832700 -1.25304000  
H 2.48278500 2.50072700 -1.88108000  
H 2.64921100 4.24662800 -2.03217700  
H -2.98556500 -0.00126800 -1.47071300  
H -4.95326800 -0.00212500 2.37225100  
H -2.74525200 -0.00119800 3.50914600  
H -0.65277400 -0.00030200 2.17122000  
H -6.30188100 -0.00265400 0.36062500

(4)

C 0.38550500 3.55345200 -0.25201800  
C -1.01130400 4.10695800 0.11301600  
C -1.74092400 3.08839600 1.03981100  
C -1.60277700 1.70044800 0.52299100  
C -0.64380200 1.23099800 -0.29933600  
C 0.35916400 2.16622100 -0.86249300  
O -2.64688400 0.91185800 1.01064100  
C -2.76401100 -0.37979700 0.49241000  
C -1.84345000 -0.93506000 -0.31944600  
C -0.56021800 -0.22868500 -0.67932500  
C -4.02800200 -0.99905200 0.97414000  
C -4.47788600 -2.16123300 0.03808900  
C -3.25551700 -3.04416900 -0.30379300  
C -2.09453600 -2.27466700 -0.90679300  
C -5.52901500 -3.00728100 0.77235900  
C -5.08261500 -1.58258200 -1.24916600  
C 0.64436200 -0.85282400 0.01224100  
C 1.88899100 -0.79747100 -0.63054300  
C 3.02751700 -1.33880000 -0.01339400  
C 2.91658400 -1.95897500 1.24251000  
C 1.67427600 -2.01631600 1.87670600  
C 0.54338900 -1.45977900 1.27161000  
C 4.31211400 -1.25795600 -0.71912200  
C 5.49374100 -0.90890100 -0.16247000  
C -0.85219400 5.43503800 0.86801700  
C -1.83696100 4.32881300 -1.16240900  
O 1.12705500 1.85440700 -1.74795000  
O -1.42488500 -2.74027300 -1.80078700  
C 6.69688500 -0.86923100 -0.94446300  
N 7.66353000 -0.84011000 -1.57713300  
C 5.65837000 -0.53620900 1.21203600  
N 5.79389100 -0.22934100 2.31825900  
H 1.03716700 3.52140600 0.64623300  
H 0.90039100 4.24761000 -0.94883100  
H -1.32007900 3.13588600 2.06882300  
H -2.80954400 3.36646300 1.15469700  
H -0.41563600 -0.30932600 -1.79609700  
H -3.87803800 -1.37508100 2.00994400  
H -4.83354700 -0.23960100 1.06073600  
H -3.55427600 -3.85389000 -1.00187100  
H -2.89025000 -3.57092800 0.60096800  
H -5.13380800 -3.45902300 1.68820000  
H -6.40507400 -2.41120600 1.05153300  
H -5.89141100 -3.82749600 0.14043500  
H -5.97488800 -0.98089000 -1.04768800  
H -4.37087300 -0.94276800 -1.78487000  
H -5.38032200 -2.37624100 -1.94496800  
H 1.96937800 -0.30165400 -1.60496300  
H 3.79118300 -2.40035300 1.71886400  
H 1.58794800 -2.49445300 2.85194000  
H -0.41710400 -1.50118500 1.78246000  
H 4.26478300 -1.49490500 -1.79384700  
H -0.25142800 5.32705100 1.77746700  
H -0.35739000 6.19039000 0.24510600  
H -1.82166800 5.85202700 1.16268200  
H -2.82279000 4.75163900 -0.94284600  
H -1.33596000 5.02153300 -1.84928500  
H -1.99710600 3.39517100 -1.71491600

(5)

C -0.04506200 3.60182900 -0.24824600  
C -1.47529200 4.10817400 0.04957100  
C -2.20076500 3.08264700 0.97189800  
C -1.99183400 1.69045900 0.49142800  
C -0.98540000 1.24102800 -0.28401200  
C 0.00715900 2.20053300 -0.82423900  
O -3.02352700 0.87346900 0.95754800  
C -3.07165900 -0.43351900 0.46716000  
C -2.10222700 -0.96991700 -0.29898400  
C -0.83712800 -0.22063800 -0.63562900  
C -4.32653400 -1.09144000 0.92049600  
C -4.69804500 -2.29115700 -0.00262200  
C -3.43125800 -3.13274800 -0.28092600  
C -2.27970800 -2.33232300 -0.86104500  
C -5.74111400 -3.16108600 0.71499600  
C -5.27867900 -1.76578800 -1.32332800  
C 0.36965200 -0.78840900 0.09880800  
C 1.62452000 -0.72535300 -0.52308000  
C 2.76481400 -1.21356000 0.13494500  
C 2.64434000 -1.78981700 1.41122700  
C 1.39192400 -1.85753600 2.02358200  
C 0.25961300 -1.35215500 1.37726600  
C 4.05835900 -1.12635400 -0.54997000  
C 5.22896100 -0.73325200 0.00559300  
C -1.39703100 5.45803200 0.77825000  
C -2.25820600 4.26890300 -1.26138100  
O 0.82708300 1.89716800 -1.66475100  
O -1.55976600 -2.79167800 -1.71823400  
C 6.45559400 -0.72406600 -0.85066800  
O 6.55377900 -1.25202000 -1.93012400  
O 7.56528600 -0.06001300 -0.39057500  
C 5.35356600 -0.32466700 1.36371800  
N 5.46132700 0.01416000 2.46500800  
H 0.57198900 3.61737100 0.67438200  
H 0.46890100 4.29912200 -0.94273200  
H -1.82142800 3.16813200 2.01438300  
H -3.28268700 3.32213300 1.04067400  
H -0.65915300 -0.31354900 -1.74667000  
H -4.19840200 -1.43813600 1.96934800  
H -5.16356000 -0.36280400 0.96156900  
H -3.67365700 -3.96873400 -0.97001200  
H -3.07873500 -3.62516400 0.64791000  
H -5.36158100 -3.57623000 1.65447200  
H -6.64893400 -2.59390300 0.94928600  
H -6.04897600 -4.00902300 0.09071200  
H -6.19990300 -1.19504200 -1.16718600  
H -4.57353300 -1.11105800 -1.84963300  
H -5.52114600 -2.58603900 -2.00974900  
H 1.71099800 -0.26372500 -1.51399000  
H 3.52071900 -2.19179100 1.91896700  
H 1.29823000 -2.30327900 3.01338600  
H -0.70992700 -1.40001900 1.87081100  
H 4.04174700 -1.40130900 -1.62194300  
H -0.82935100 5.39414900 1.71269300  
H -0.90728400 6.21803600 0.15697900  
H -2.39274000 5.84331700 1.02482000  
H -3.26776300 4.65656100 -1.08988400  
H -1.75822800 4.96598200 -1.94462100  
H -2.35985700 3.31781300 -1.79782400  
H 7.48077300 0.39577100 0.47904300

(6)

C -3.13593200 -3.43107000 0.70300900  
C -4.58150500 -2.89270000 0.59803200  
C -4.62099600 -1.71327000 -0.42063700  
C -3.47817300 -0.78374500 -0.21336300  
C -2.31239100 -1.05077500 0.40530600  
C -2.11618800 -2.36706500 1.06451600  
O -3.78081800 0.46377500 -0.76746700  
C -2.88330300 1.50338500 -0.52027600  
C -1.69502900 1.32655500 0.09064200  
C -1.19180700 -0.04414100 0.47787200  
C -3.45182900 2.78471300 -1.01894800  
C -2.81672600 4.00267100 -0.28325100  
C -1.28340100 3.81480100 -0.21691000  
C -0.84782900 2.50101600 0.40374100  
C -3.14039300 5.27993600 -1.07307000  
C -3.39384900 4.10827400 1.13568200  
C -0.03552800 -0.42464000 -0.43631900  
C 1.27131000 -0.13011600 -0.02634800  
C 2.36395200 -0.46732400 -0.84344400  
C 2.14033400 -1.07750200 -2.08895800  
C 0.83510700 -1.35345900 -2.50176600  
C -0.24989200 -1.03239500 -1.68141600  
C 3.71193900 -0.13771000 -0.36788700  
C 4.82045600 -0.89905500 -0.50187500  
C -5.50675800 -4.01067600 0.09411500  
C -5.05873000 -2.40248600 1.97279900  
O 0.14400700 2.43460100 1.09835300  
O -1.21228800 -2.59006200 1.83673800  
C 6.14028700 -0.45697700 0.03422000  
O 7.15415300 -1.09767000 0.16303000  
O 6.06829300 0.87641600 0.37996600  
C 7.35488600 1.07756700 2.43977800  
C 7.25473000 1.48602400 0.98601000  
C 4.84068400 -2.18386500 -1.12671800  
N 4.85786000 -3.22314600 -1.63359700  
H -2.82408500 -3.90177200 -0.25148400  
H -3.08696800 -4.24938600 1.45144000  
H -4.58772100 -2.10359400 -1.46153300  
H -5.58888300 -1.17403600 -0.34877600  
H -0.81733700 -0.00997000 1.54210800  
H -3.27212400 2.86031600 -2.11412800  
H -4.55648500 2.79907000 -0.90856100  
H -0.82118600 4.65251500 0.34571900  
H -0.84081200 3.87777600 -1.23257500  
H -2.73087200 5.25596900 -2.08842600  
H -4.22111500 5.43940500 -1.15876200  
H -2.72624600 6.16820500 -0.58051400  
H -4.47627600 4.27293100 1.12562100  
H -3.20697000 3.20076300 1.72259900  
H -2.94678400 4.94196100 1.69015300  
H 1.43246900 0.37325300 0.93306700  
H 2.97816300 -1.32844100 -2.73930900  
H 0.66423000 -1.82676100 -3.46804900  
H -1.26292000 -1.25448400 -2.01233700  
H 3.79205600 0.83109800 0.16010600  
H -5.18865500 -4.40819000 -0.87542100  
H -5.52845600 -4.85456200 0.79476600  
H -6.53981500 -3.66265700 -0.01581300  
H -6.09561800 -2.05229700 1.94523500  
H -5.00849100 -3.20097100 2.72293400  
H -4.44379200 -1.57604500 2.34916800  
H 8.14065000 1.63693200 2.96114600  
H 6.41149600 1.24770700 2.97481500  
H 7.59378100 0.00720700 2.53773700  
H 8.14088900 1.18948300 0.39661500  
H 7.02552300 2.55826800 0.84545500
